1 **Drought stress delays photosynthetic induction and accelerates photoinhibition of**  
2 **photosystem I under fluctuating light**

3

4 Hu Sun<sup>1,2</sup>, Qi Shi<sup>1,2</sup>, Ning-Yu Liu<sup>1,2</sup>, Shi-Bao Zhang<sup>1</sup>, Wei Huang<sup>1</sup>

5

6 <sup>1</sup> Kunming Institute of Botany, Chinese Academy of Sciences, Kunming 650201, China

7 <sup>2</sup> University of Chinese Academy of Sciences, Beijing 100049, China

8

9 **Corresponding authors:**

10 Shi-Bao Zhang: sbzhang@mail.kib.ac.cn

11 Wei Huang: huangwei@mail.kib.ac.cn

12

13 **Funding:**

14 1. the National Natural Science Foundation of China (No. 31971412, 32171505).

15 2. the Project for Innovation Team of Yunnan Province.

16

17 **Running head:**

18 Photosynthesis under drought and fluctuating light

19

20 **Abstract**

21 Fluctuating light (FL) and drought stress usually occur concomitantly. However, whether  
22 drought stress affects photosynthetic performance under FL remains unknown. Here, we  
23 measured gas exchange, chlorophyll fluorescence, and P700 redox state under FL in  
24 drought-stressed tomato (*Solanum lycopersicum*) seedlings. Drought stress significantly  
25 affected stomatal opening and mesophyll conductance after transition from low to high light  
26 and thus delayed photosynthetic induction under FL. Therefore, drought stress exacerbated  
27 the loss of carbon gain under FL. Furthermore, restriction of CO<sub>2</sub> fixation under drought  
28 stress aggravated the over-reduction of photosystem I (PSI) upon transition from low to high  
29 light. The resulting stronger FL-induced PSI photoinhibition significantly suppressed linear  
30 electron flow and PSI photoprotection. These results indicated that drought stress not only  
31 affected gas exchange under FL but also accelerated FL-induced photoinhibition of PSI.  
32 Furthermore, drought stress enhanced relative cyclic electron flow in FL, which partially  
33 compensated for restricted CO<sub>2</sub> fixation and thus favored PSI photoprotection under FL.  
34 Therefore, drought stress has large effects on photosynthetic dark and light reactions under  
35 FL.

36

37 **Keywords:** drought, fluctuating light, photoinhibition, photosynthesis, stomatal conductance,  
38 tomato.

39

40 **Acknowledgements:**

41 The authors acknowledge the financial support by the National Natural Science Foundation of  
42 China (No. 31971412, 32171505) and the Project for Innovation Team of Yunnan Province.

43

44 **Conflict of Interest:**

45 The authors declare no conflict of interest.

46

## 47 **Introduction**

48       During diurnal photosynthesis under natural field conditions, leaves usually experience  
49 dynamic changes in light intensity on timescales from milliseconds to hours, owing to the  
50 variation of the solar angle, cloud movement, wind-induced leaf fluttering, and shading from  
51 overlapping leaves and neighboring plants (Percy 1990; Slattery, Walker, Weber & Ort  
52 2018). In addition to fluctuating light (FL), plants often experience suboptimal conditions,  
53 such as drought. Many studies have examined the effect of drought stress on photosynthesis  
54 under stable light intensity (Oukarroum, Schansker & Strasser 2009; Galmés *et al.* 2013;  
55 Zivcak *et al.* 2013). However, drought stress is rarely studied under FL conditions (Grieco *et al.*  
56 2020; Qu *et al.* 2020). Under FL, plants may exhibit different photosynthetic performance  
57 when also experiencing drought stress compared with sufficient water conditions. To  
58 understand how plants perform under a combination of FL and drought stress in the field, it is  
59 important to explore the photosynthetic physiology of drought-stressed plants under FL.

60       After transition from low to high light, the net CO<sub>2</sub> assimilation rate ( $A_N$ ) gradually  
61 increases, which is termed “photosynthetic induction”. The rate of photosynthetic induction  
62 significantly affects carbon gain and thus affects plant biomass when grown under FL (Adachi  
63 *et al.* 2019; Kimura, Hashimoto-Sugimoto, Iba, Terashima & Yamori 2020; Yamori, Kusumi,  
64 Iba & Terashima 2020). Therefore, promoting the rate of photosynthetic induction is a  
65 potential target for improving crop yield (De Souza, Wang, Orr, Carmo-Silva & Long 2020;  
66 Acevedo-Siaca *et al.* 2020). Under high light,  $A_N$  is determined by CO<sub>2</sub> diffusional  
67 conductance and biochemical factors (Grassi & Magnani 2005). CO<sub>2</sub> diffusional conductance  
68 refers to CO<sub>2</sub> diffusion from the atmosphere to the chloroplast stroma, including stomatal  
69 conductance ( $g_s$ ) and mesophyll conductance ( $g_m$ ) (Flexas *et al.* 2014). Biochemical factors  
70 include the activation of electron transport, Calvin–Benson cycle enzymes, especially  
71 Rubisco, and sucrose synthesis (Sakoda, Yamori, Groszmann & Evans 2021). A recent study  
72 revealed that the induction of  $A_N$  under FL was mainly affected by  $g_s$  rather than  $g_m$  in  
73 *Arabidopsis thaliana* and tobacco (*Nicotiana tabacum*) plants in the absence of water stress  
74 (Sakoda *et al.* 2021). Increasing the stomatal opening significantly enhanced the induction of  
75  $A_N$  and plant biomass under FL (Kimura *et al.* 2020; Yamori *et al.* 2020). Drought stress

76 usually reduces  $g_s$  and  $g_m$  under constant high light, leading to decreased chloroplast  $\text{CO}_2$   
77 concentration ( $C_c$ ) (Warren, Livingston & Turpin 2004). Under such conditions,  $\text{CO}_2$  fixation  
78 in chloroplast carboxylation sites is restricted by the lack of  $\text{CO}_2$ . Therefore, the relative  
79 limitations of  $g_s$  and  $g_m$  imposed on  $A_N$  are enhanced under drought stress. However, it is  
80 unclear whether drought stress affects the induction responses of  $g_s$ ,  $g_m$ , and  $A_N$  under FL.  
81 Characterizing the dynamics of  $g_s$  and  $g_m$  and how they limit  $A_N$  under drought and FL is  
82 crucial for understanding the physiological mechanisms regulating carbon gain by plants  
83 under suboptimal field conditions.

84 In addition to photosynthetic dark reactions, FL affects photosynthetic light reactions.  
85 Upon a sudden increase in light intensity, electron flow from photosystem II (PSII) to  
86 photosystem I (PSI) rapidly increases (Huang, Yang & Zhang 2019a; Sun, Zhang, Liu &  
87 Huang 2020b). Meanwhile,  $\text{CO}_2$  fixation is not fully activated (Tanaka, Adachi & Yamori  
88 2019), generating an imbalance between the production of excited states and the consumption  
89 of reducing power (Gerotto *et al.* 2016; Tan, Huang, Zhang, Zhang & Huang 2021). The  
90 resulting PSI over-reduction increases the production of reactive oxygen species (ROS) in PSI.  
91 Consequently, oxidative damage to PSI occurs because the ROS produced within thylakoid  
92 membranes cannot be immediately scavenged by antioxidant systems (Takagi, Takumi,  
93 Hashiguchi, Sejima & Miyake 2016). Therefore, FL can cause selective photoinhibition of  
94 PSI in many angiosperms (Yamori, Makino & Shikanai 2016; Yamamoto & Shikanai 2019;  
95 Huang, Yang & Zhang 2019b). PSI damage suppresses photosynthetic electron flow,  
96 photoprotection, and  $\text{CO}_2$  assimilation (Sejima, Takagi, Fukayama, Makino & Miyake 2014;  
97 Zivcak, Brestic, Kunderlikova, Sytar & Allakhverdiev 2015; Shimakawa & Miyake 2019),  
98 first impairing plant growth and even causing plant death (Suorsa *et al.* 2012; Yamori *et al.*  
99 2016). The PSI redox state under FL is significantly affected by the electron sink downstream  
100 of PSI (Wada *et al.* 2018; Tazoe *et al.* 2020; Sun, Yang & Huang 2020a). However, little is  
101 known about the effects of drought stress on the PSI redox state and PSI photoinhibition  
102 under FL.

103 Plants have evolved several alternative electron flows to protect PSI against  
104 photoinhibition under FL (Allahverdiyeva, Suorsa, Tikkanen & Aro 2015; Armbruster, Correa  
105 Galvis, Kunz & Strand 2017; Shikanai & Yamamoto 2017). Cyclic electron flow (CEF)

106 around PSI is used by angiosperms to fine-tune photosynthetic apparatus under FL (Suorsa *et*  
107 *al.* 2012; Yamamoto & Shikanai 2019). After transition from low to high light, CEF activity  
108 usually increases to allow fast formation of the trans-thylakoid proton gradient ( $\Delta pH$ ), which  
109 alleviates the PSI over-reduction at donor and acceptor sides (Kono, Noguchi & Terashima  
110 2014; Yang, Ding & Huang 2019a). Once a sufficient  $\Delta pH$  forms, CEF activity decreases to  
111 steady-state levels to prevent over-acidification of the thylakoid lumen. Therefore, the  
112 dynamic regulation of CEF activity under FL is crucial for balancing photoprotection and  
113 photosynthesis (Alboresi, Storti & Morosinotto 2019). Previous studies have documented that  
114 CEF activity under FL is largely affected by the redox state of PSI (Yang *et al.* 2019a; Tan *et*  
115 *al.* 2021). In particular, CEF activity increases with moderate PSI over-reduction but  
116 maintains at a low level when PSI over-reduction is missing. However, the effects of drought  
117 stress on the dynamic regulation of CEF activity under FL is largely unknown.

118 The aim of this study was to investigate whether and how drought stress affects  
119 photosynthetic light and dark reactions under FL. With this knowledge it may be possible to  
120 understand how drought stress interacts with FL to affect photosynthetic physiology and plant  
121 growth. Tomato was used in this study, as it is a C3 model species with intermediate leaf  
122 photosynthetic capacity and an important vegetable crop worldwide. To address the above  
123 question, tomato plants were grown under full sun light with sufficient or deficient water. We  
124 then measured the rapid changes in gas exchange, chlorophyll fluorescence, and P700 signals  
125 under FL.

126

## 127 **Materials and methods**

### 128 **Plant materials and growth conditions**

129 Tomato (*Solanum lycopersicum* Miller cv. Hupishizi) plants were grown in a greenhouse  
130 under 40% full sunlight. Day/night air temperatures were approximately 30/20°C, relative  
131 humidity was approximately 60-70%, and maximum light intensity was approximately 800  
132  $\mu\text{mol photons m}^{-2} \text{s}^{-1}$ . The plants were grown in 19-cm diameter plastic pots with humus soil,  
133 and the initial soil N content was 2.1 mg/g. Plants were fertilized with 0.15 g N/plant every  
134 two days using Peters Professional's water solution (N:P:K = 15:4.8:24.1) and watered every  
135 day. After cultivation for one and a half months, plants were watered using running water with

136 400g/pot (CK) or 200g/pot (drought) for 1 week, and then mature leaves were used for  
137 photosynthetic measurements.

138

### 139 **Chlorophyll content measurement in vivo**

140 A handheld chlorophyll meter (SPAD-502 Plus; Minolta, Tokyo, Japan) was used to  
141 non-destructively measure the relative content of chlorophyll per unit leaf area.

142

### 143 **Gas exchange and chlorophyll fluorescence measurements**

144 An open gas exchange system (LI-6400XT; Li-Cor Biosciences, Lincoln, NE, USA) was  
145 used to simultaneously measure gas exchange and chlorophyll fluorescence. After  
146 photosynthetic induction at 1500  $\mu\text{mol photons m}^{-2} \text{ s}^{-1}$  and 400  $\mu\text{mol mol}^{-1} \text{ CO}_2$   
147 concentration for 20 min, the net  $\text{CO}_2$  assimilation rate and  $g_s$  reached steady-state values.  
148 Then, the light intensity was changed to 100  $\mu\text{mol photons m}^{-2} \text{ s}^{-1}$  for 5 min to conduct low  
149 light adaptation. Afterward, the light intensity was changed back to 1500  $\mu\text{mol photons m}^{-2}$   
150  $\text{s}^{-1}$  to measure the photosynthetic induction phase. After adequate photosynthetic induction,  
151 the response of  $\text{CO}_2$  assimilation rate to incident intercellular  $\text{CO}_2$  concentration ( $A/C_i$ ) curves  
152 were measured by decreasing the  $\text{CO}_2$  concentration to a lower limit of 50  $\mu\text{mol mol}^{-1}$  and  
153 then increasing stepwise to an upper limit of 1500  $\mu\text{mol mol}^{-1}$ . For each  $\text{CO}_2$  concentration,  
154 photosynthetic measurement was completed in 3 min. Using the  $A/C_i$  curves, the maximum  
155 rates of RuBP regeneration ( $J_{\text{max}}$ ) and carboxylation ( $V_{\text{cmax}}$ ) were calculated (Long &  
156 Bernacchi 2003).

157 The quantum yield of PSII photochemistry was calculated as  $\Phi_{\text{PSII}} = (F_m' - F_s)/F_m'$  (Genty,  
158 Briantais & Baker 1989), where  $F_m'$  and  $F_s$  represent the maximum and steady-state  
159 fluorescence after light adaptation, respectively (Baker 2004). The total electron transport rate  
160 through PSII ( $J_{\text{PSII}}$ ) was calculated as follows (Krall & Edwards 1992):

$$J_{\text{PSII}} = \Phi_{\text{PSII}} \times \text{PPFD} \times L_{\text{abs}} \times 0.5$$

161 where PPFD is the photosynthetic photon flux density and leaf absorbance ( $L_{\text{abs}}$ ) is assumed  
162 to be 0.84. We applied the constant of 0.5 based on the assumption that photons were equally  
163 distributed between PSI and PSII.

164

165 **Estimation of mesophyll conductance and chloroplast CO<sub>2</sub> concentration**

166 Mesophyll conductance was calculated according to the following equation (Harley,  
167 Loreto, Di Marco & Sharkey 1992):

$$g_m = \frac{A_N}{C_i - \Gamma^* (J_{PSII} + 8(A_N + R_d)) / (J_{PSII} - 4(A_N + R_d))}$$

168 where  $A_N$  represents the net rate of CO<sub>2</sub> assimilation;  $C_i$  is the intercellular CO<sub>2</sub> concentration;  
169  $\Gamma^*$  is the CO<sub>2</sub> compensation point in the absence of daytime respiration (Yamori, Noguchi,  
170 Hikosaka & Terashima 2010b; von Caemmerer & Evans 2015), and we used a typical value  
171 of 40  $\mu\text{mol mol}^{-1}$  in our current study (Xiong, Douthe & Flexas 2018). Respiration rate in the  
172 dark ( $R_d$ ) was considered to be half of the dark-adapted mitochondrial respiration rate as  
173 measured after 10 min of dark adaptation (Carriquí *et al.* 2015).

174 Based on the estimated  $g_m$ , we then calculated the chloroplast CO<sub>2</sub> concentration ( $C_c$ )  
175 according to the following equation (Long & Bernacchi 2003; Warren & Dreyer 2006):

$$C_c = C_i - \frac{A_N}{g_m}$$

176 To identify the rate-limiting step of CO<sub>2</sub> assimilation, we subsequently estimated  $C_{\text{trans}}$   
177 (the chloroplast CO<sub>2</sub> concentration at which the limitation to  $A_N$  transitioned from RuBP  
178 carboxylation to RuBP regeneration) (Yamori, Evans & Von Caemmerer 2010a; Yamori,  
179 Nagai & Makino 2011):

$$C_{\text{trans}} = \frac{K_c(1 + O/K_o)J_{\text{max}}/4V_{\text{cmax}} - 2\Gamma^*}{1 - J_{\text{max}}/4V_{\text{cmax}}}$$

180 where  $K_c$  ( $\mu\text{mol mol}^{-1}$ ) and  $K_o$  ( $\text{mmol mol}^{-1}$ ) are assumed to be 407  $\mu\text{mol mol}^{-1}$  and 277  $\text{mmol}$   
181  $\text{mol}^{-1}$  at 25°C, respectively (Long and Bernacchi 2003);  $O$  was assumed to be 210  $\text{mmol mol}^{-1}$   
182 (Farquhar *et al.* 1980). The rate-limiting step for CO<sub>2</sub> assimilation was analyzed by comparing  
183 the values of  $C_c$  and  $C_{\text{trans}}$ .  $A_N$  tends to be limited by RuBP carboxylation when  $C_c$  is lower  
184 than  $C_{\text{trans}}$  and tends to be limited by RuBP regeneration when  $C_c$  is higher than  $C_{\text{trans}}$ .

185

186 **Quantitative limitation analysis of  $A_N$**

187 Relative photosynthetic limitations were assessed as follows (Grassi & Magnani 2005):

$$L_s = \frac{g_{\text{tot}}/g_s \times \partial A_N / \partial C_c}{g_{\text{tot}} + \partial A_N / \partial C_c}$$
$$L_{\text{mc}} = \frac{g_{\text{tot}}/g_m \times \partial A_N / \partial C_c}{g_{\text{tot}} + \partial A_N / \partial C_c}$$

$$L_b = \frac{g_{\text{tot}}}{g_{\text{tot}} + \partial A_N / \partial C_c}$$

188 where  $L_s$ ,  $L_{mc}$ , and  $L_b$  represent the relative limitations of stomatal conductance, mesophyll  
189 conductance, and biochemical capacity, respectively, in setting the observed value of  $A_N$ .  $g_{\text{tot}}$   
190 is the total conductance of  $\text{CO}_2$  between the leaf surface and sites of RuBP carboxylation  
191 (calculated as  $1/g_{\text{tot}} = 1/g_s + 1/g_m$ ).

192

### 193 **P700 and chlorophyll fluorescence measurements**

194 PSI and PSII parameters were measured at 25°C under atmospheric  $\text{CO}_2$  condition using  
195 a Dual-PAM 100 measuring system (Heinz Walz, Effeltrich, Germany). Light from a 635-nm  
196 light-emitting diode array equipped in Dual-PAM 100 was used as actinic light for  
197 illumination. After dark adaptation for at least 15 min, a saturating pulse (20,000  $\mu\text{mol}$   
198 photons  $\text{m}^{-2} \text{s}^{-1}$ , 300 ms) was used to measure the maximum fluorescence intensity ( $F_m$ ) and  
199 the maximum photo-oxidizable P700 ( $P_m$ ). Subsequently, leaves were exposed to 1455  $\mu\text{mol}$   
200 photons  $\text{m}^{-2} \text{s}^{-1}$  for 5 min to activate photosynthetic electron sinks and then illuminated at  
201 fluctuating light alternating between low light (59  $\mu\text{mol}$  photons  $\text{m}^{-2} \text{s}^{-1}$ , 2 min) and high light  
202 (1455  $\mu\text{mol}$  photons  $\text{m}^{-2} \text{s}^{-1}$ , 1 min). During this fluctuating light treatment, PSI and PSII  
203 parameters were recorded simultaneously. After the fluctuating light treatment,  $P_m$  was  
204 measured after a 15-min dark adaptation.

205 The chlorophyll fluorescence parameters were calculated as follows:  $Y(\text{II}) = (F_m' - F_s) /$   
206  $F_m'$ ;  $\text{NPQ} = (F_m - F_m') / F_m'$ ;  $Y(\text{NO}) = F_s / F_m$ .  $Y(\text{II})$  is the quantum yield of PSII  
207 photochemistry; NPQ, non-photochemical quenching in PSII;  $Y(\text{NO})$ , the quantum yield of  
208 non-regulatory energy dissipation in PSII.  $F_m$  and  $F_m'$  are the maximum fluorescence intensity  
209 after dark and light acclimation, respectively.  $F_s$  is the light-adapted steady-state fluorescence.

210 PSI photosynthetic parameters were measured by a Dual PAM-100 based on P700 signal  
211 (difference of intensities of 830 and 875 nm pulse-modulated measuring light reaching the  
212 photodetector). The P700<sup>+</sup> signals ( $P$ ) may vary between a minimal (P700 fully reduced) and  
213 a maximal level (P700 fully oxidized). The maximum level ( $P_m$ ) was determined with  
214 application of a saturating pulse (20,000  $\mu\text{mol}$  photons  $\text{m}^{-2} \text{s}^{-1}$  and 300 ms) after  
215 pre-illumination with far-red light, and  $P_m$  was used to estimate the PSI activity.  $P_m'$  was



216 determined similarly to  $P_m$  but with actinic light instead of far-red light. PSI parameters were  
217 calculated as follows:  $Y(I) = (P_m' - P)/P_m$ ;  $Y(ND) = P/P_m$ ;  $Y(NA) = (P_m - P_m')/P_m$ .  $Y(I)$  is the  
218 quantum yield of PSI photochemistry;  $Y(ND)$ , the quantum yield of PSI non-photochemical  
219 energy dissipation due to donor side limitation;  $Y(NA)$ , the quantum yield of PSI  
220 non-photochemical energy dissipation due to acceptor side limitation. The photosynthetic  
221 electron transport rate was calculated as  $ETRI$  (or  $ETRII$ ) =  $PPFD \times Y(I)$  [or  $Y(II)$ ]  $\times 0.84 \times$   
222  $0.5$ , light absorption is assumed to be  $0.84$  of incident irradiance, and  $0.5$  is the fraction of  
223 absorbed light reaching PSI or PSII. The relative CEF value was measured by the ratio of  $Y(I)$   
224 to  $Y(II)$  (Grieco *et al.* 2020).

225

## 226 **Statistical analysis**

227 One-way ANOVA and t-tests were used to determine whether significant differences  
228 existed between different treatments ( $\alpha = 0.05$ ). The software SigmaPlot 10.0 was used for  
229 graphing and fitting.

230

## 231 **Results**

### 232 **Effects of drought stress on gas exchange under FL**

233 After water deficit treatment for one week, the maximum quantum yield of PSII after  
234 dark adaptation was maintained at approximately  $0.84$  (data not shown), indicating that PSII  
235 activity was not significantly photoinhibited under drought stress. At low light intensity of  
236  $100 \mu\text{mol photons m}^{-2} \text{ s}^{-1}$ , the steady-state net rate of  $\text{CO}_2$  assimilation ( $A_N$ ) was slightly  
237 affected by drought stress. However, drought stress significantly affected steady-state  $A_N$ ,  
238 stomatal conductance ( $g_s$ ), and mesophyll conductance ( $g_m$ ) under high light. Furthermore, the  
239 photosynthetic induction after transition from low to high light was largely affected by  
240 drought stress (Fig. 1A). After transition from  $100$  to  $1500 \mu\text{mol photons m}^{-2} \text{ s}^{-1}$  for  $1$  min,  $A_N$   
241 rapidly increased to  $17.5 \mu\text{mol m}^{-2} \text{ s}^{-1}$  in control (CK) plants but only increased to  $4.0 \mu\text{mol}$   
242  $\text{m}^{-2} \text{ s}^{-1}$  under drought (Fig. 1A). The time required for  $A_N$  to reach  $80\%$  of the maximum  
243 value was approximately  $2$  min in CK plants but  $10$  min under drought stress (Fig. 1B).  
244 Drought stress decreased  $g_s$  under low and high light compared to CK levels (Fig. 1C).  
245 Furthermore, the  $g_s$  level at low light was greatly reduced under drought stress compared with

246 the maximum  $g_s$  under high light, whereas there was less relative difference in  $g_s$  between low  
247 and high light in CK (Fig. 1D). Drought stress also lowered  $g_m$  under high light compared to  
248 CK (Fig. 1E). After transition from 100 to 1500  $\mu\text{mol photons m}^{-2} \text{s}^{-1}$ , the time taken for  $g_m$  to  
249 reach the maximum value was approximately 3 min in CK plants but 11 min under drought  
250 stress (Fig. 1F). Therefore, drought stress delayed the induction responses of  $g_s$ ,  $g_m$ , and  $A_N$   
251 under FL.

252 Due to lower levels of  $\text{CO}_2$  diffusional conductance, the intercellular  $\text{CO}_2$  concentration  
253 ( $C_i$ ) and chloroplast  $\text{CO}_2$  concentration ( $C_c$ ) under high light largely decreased under drought  
254 stress compared to CK (Fig. 2A and B). The values of  $C_c$  during photosynthetic induction  
255 were always higher than  $C_{\text{trans}}$  (the chloroplast  $\text{CO}_2$  concentration at which the limitation to  $A_N$   
256 transitioned from RuBP carboxylation to RuBP regeneration) in CK plants but were always  
257 lower than  $C_{\text{trans}}$  under drought stress, indicating that  $A_N$  tended to be limited by RuBP  
258 regeneration in CK plants and by RuBP carboxylation under drought stress. Therefore, the  
259 rate-limiting step for  $A_N$  during photosynthetic induction was altered by drought stress. The  
260 change in  $A_N$  during photosynthetic induction was tightly and positively correlated to  $C_c$  (Fig.  
261 2C), indicating  $\text{CO}_2$  fixation under FL was largely restricted by  $C_c$ . Quantitative analysis of  
262 photosynthetic limitations revealed stomatal limitation ( $L_s$ ) and mesophyll conductance  
263 limitation ( $L_{\text{mc}}$ ) were enhanced under drought stress (Fig. 3A and B). Concomitantly,  
264 biochemistry limitation ( $L_b$ ) decreased under drought stress (Fig. 3C). Therefore, the major  
265 limitation of photosynthesis under FL also changed under drought stress.

266

### 267 **Effects of drought stress on light reactions under FL**

268 During photosynthetic induction, the quantum yield of PSI photochemistry ( $Y(\text{I})$ ) under  
269 high-light phases decreased under drought stress (Fig. 4A), whereas the PSI donor side  
270 limitation ( $Y(\text{ND})$ ) decreased under drought stress (Fig. 4B), leading to the higher PSI  
271 acceptor side limitation ( $Y(\text{NA})$ ) in plants exposed to drought stress (Fig. 4C). Therefore,  
272 drought stress induced stronger PSI over-reduction under FL. Furthermore, under sufficient  
273 water supply, the PSI over-reduction under FL was mainly observed after transitioning from  
274 low to high light for 10 s (Fig. 4C). By comparison, plants also displayed severe PSI  
275 over-reduction after this light transition for 30 s under drought stress (Fig. 4C). Therefore,

276 drought stress prolonged the time course of PSI over-reduction under FL.

277        Similar to Y(I), drought stress decreased the value of Y(II) at high light during  
278 photosynthetic induction (Fig. 5A). The induction response of NPQ was not affected by  
279 drought stress (Fig. 5B), leading to small changes in the quantum yield of non-regulatory  
280 energy dissipation in PSII (Y(NO)) between CK and drought-stressed plants (Fig. 5C).  
281 Drought stress had minimal effects on electron transport rates through PSI and PSII (ETRI  
282 and ETRII) at low light (Fig. 6A and B). However, the relative values of ETRI and ETRII  
283 under high light significantly decreased after drought treatment (Fig. 6A and B), which was  
284 consistent with the decreased  $A_N$  under drought stress. The relative CEF value under high  
285 light, measured as the ratio of Y(I) to Y(II), was higher in drought-stressed plants compared to  
286 CK plants (Fig. 6C). Furthermore, CEF could not be fully activated within the first 10 s under  
287 drought stress, suggesting that drought stress induced a delayed activation of CEF under FL.  
288 Therefore, the changing model of CEF under FL was altered by drought stress.

289        After FL treatment, the decrease in  $P_m$  was significantly higher under drought stress (Fig.  
290 7A), indicating that drought stress significantly accelerated PSI photoinhibition under FL. The  
291 greater FL-induced PSI photoinhibition under drought stress was largely caused by the  
292 stronger PSI over-reduction within the first 30 s after transition from low to high light (Fig.  
293 7B). Furthermore, a tight inverse relationship was found between the extent of FL-induced  
294 PSI photoinhibition and the maximum  $CO_2$  assimilation rate (Fig. 7C), suggesting that the  
295 restriction of  $CO_2$  fixation under drought stress accelerated FL-induced PSI photoinhibition.  
296 After the FL treatment, ETRII under high light significantly decreased in drought-stressed  
297 plants (Fig. 8). Concomitantly, Y(ND) significantly decreased and Y(NA) significantly  
298 increased (Fig. 8). These results indicated that the greater FL-induced PSI photoinhibition  
299 under drought stress significantly affected linear electron flow and PSI photoprotection under  
300 high light.

301

## 302 **Discussion**

303        In nature, FL usually occurs concomitantly with drought stress. However, the effects of  
304 drought stress on photosynthetic performances under FL are little known. We here for the first  
305 time examined the effects of drought stress on photosynthetic induction and PSI

306 photoinhibition under FL in tomato.

307

### 308 **Drought stress delayed photosynthetic induction under FL**

309 The response of  $A_N$  to a rapid change of light intensity plays an important role in  
310 determining plant biomass under FL (Violet-Chabrand, Matthews, Simkin, Raines & Lawson  
311 2017; Slattery *et al.* 2018; Kimura *et al.* 2020; Yamori *et al.* 2020). Drought stress usually  
312 decreases steady-state  $g_s$ ,  $g_m$ , and  $A_N$  under constant high light (Warren *et al.* 2004; Huang *et al.*  
313 *et al.* 2013; Zivcak *et al.* 2013), but the effects of drought stress on the induction response of  $g_s$ ,  
314  $g_m$ , and  $A_N$  under FL are not well known. Similar to previous studies, we found the maximum  
315  $g_s$ ,  $g_m$ , and  $A_N$  under constant high light significantly declined in drought-stressed tomato  
316 plants (Fig. 1). Moreover, drought stress largely affected the induction responses of  $g_s$  and  $g_m$   
317 after transition from low to high light and consequently delayed the induction response of  $A_N$ .  
318  $A_N$  in CK plants reached 80% of the maximum value approximately 2 min after transition  
319 from 100 to 1500  $\mu\text{mol photons m}^{-2} \text{s}^{-1}$  (Fig. 1). Such photosynthetic induction required 10  
320 min in drought-stressed plants. Therefore, drought stress caused a larger loss of carbon gain  
321 upon transition from low to high light in tomato. Similar to observations under drought stress,  
322 tomato plants display relatively lower  $g_s$  under salt stress, and the decrease in  $g_s$  under salt  
323 stress reduced plant biomass when grown under FL (Zhang, Kaiser, Marcelis, Yang & Li  
324 2020). However, the underlying mechanisms of this response are not well known. Our present  
325 study provided a possible explanation for why salt stress reduces plant biomass in tomato  
326 plants grown under FL.

327 Recent studies indicate stomatal opening under FL could be affected by stomatal density  
328 and area (Zhang *et al.* 2020; Sakoda *et al.* 2020). In the present study, the drought treatment  
329 just lasted for 1 week, and we used mature leaves developed prior to the treatment period for  
330 photosynthetic measurements. Therefore, the slower stomatal opening under drought stress  
331 was independent of stomatal density and area and was likely caused by other factors such as  
332 abscisic acid and gene regulation. Abscisic acid is upregulated under drought stress, which  
333 could induce stomatal closure (Ramachandra & Viswanatha 2004; Harb, Krishnan,  
334 Ambavaram & Pereira 2010; Kaiser, Morales, Harbinson, Heuvelink & Marcelis 2020).  
335 Furthermore, the expression of *slow anion channel-associated 1 (slac1)*, *open stomata 1*

336 (*ost1*), and *proton ATPase translocation control 1 (PATROL1)* play important roles in  
337 stomatal opening under FL (Kimura *et al.* 2020; Yamori *et al.* 2020). Drought stress might  
338 influence the expression of these target genes and thus affect the stomatal opening under FL.

339       Photosynthesis can be limited by  $g_s$ ,  $g_m$ , and biochemical factors, but the relative  
340 photosynthetic limitations largely vary among species (Grassi & Magnani 2005; Carriqui *et al.*  
341 2015; Xiong *et al.* 2018). We found that drought stress increased the diffusional limitation of  
342  $A_N$  under FL, and the major limiting factor of photosynthesis was altered by drought stress  
343 (Fig. 3). In *Arabidopsis thaliana* and tobacco,  $CO_2$  diffusional limitation was the major  
344 limiting factor of photosynthesis in the initial 10 min after transition from dark to light  
345 (Sakoda *et al.* 2021). By comparison,  $L_s$ ,  $L_{mc}$  and  $L_b$  changed little after the transition from  
346 low to high light in the CK plants (Fig. 3). Therefore, the dynamic changes in relative  
347 limitations of  $A_N$  after the transition from low to high light differed from that after the  
348 transition from dark to high light. Due to decreased  $g_s$  and  $g_m$  under drought stress,  $C_c$  was  
349 lower in high-light phases under FL, and therefore photosynthesis under FL was strongly  
350 restricted by  $C_c$  (Fig. 2). Furthermore, after transition from low to high light, the  $C_c$  values in  
351 the CK plants were always higher than  $C_{trans}$  (Fig. 2), indicating that  $A_N$  was mainly limited by  
352 RuBP regeneration. By contrast, the  $C_c$  values under FL were always lower than  $C_{trans}$  under  
353 drought stress (Fig. 2), and hence  $A_N$  tended to be mainly limited by RuBP carboxylation.  
354 Therefore, the rate-limiting step for  $A_N$  during photosynthetic induction was influenced by  
355 drought stress.

356

### 357 **Drought stress accelerated PSI photoinhibition under FL**

358       A sudden increase in light intensity causes a rapid increase in PSII electron flow to PSI,  
359 whereas the full activation of  $CO_2$  fixation requires more time (Lawson & Blatt 2014; Yamori  
360 *et al.* 2016). Therefore, the excited states in PSI cannot be immediately consumed by primary  
361 metabolism, leading to the accumulation of reducing power in PSI. The resulting PSI  
362 over-reduction promotes ROS formation in PSI and causes PSI photoinhibition (Yamori *et al.*  
363 2016; Huang *et al.* 2019a). Under drought stress, lower  $g_s$  restricted  $CO_2$  fixation and thus  
364 decreased the rate of NADPH production. Because the pool of NADPH is relatively small,  
365 drought stress will increase the NADPH/NADP<sup>+</sup> ratio when exposed to a sudden increase in

366 illumination. Under such conditions, electron flow from PSI to NADP<sup>+</sup> would be limited by  
367 the lack of NADP<sup>+</sup>, suppressing the oxidation of PSI under FL (Grieco *et al.* 2020). Therefore,  
368 drought stress is hypothesized to accelerate PSI over-reduction under FL. Consistently, we  
369 found that PSI over-reduction under FL was aggravated under drought stress (Fig. 4). After a  
370 sudden increase in irradiance, tomato plants showed a transient PSI over-reduction in CK  
371 plants, indicating that the electrons transported to PSI could not be immediately consumed by  
372 downstream sinks. In angiosperms, outflows of electrons from PSI include two pathways:  
373 linear electron flow (LEF) (PSI to NADP<sup>+</sup>) and the water-water cycle mediated by the Mehler  
374 reaction (Ilík *et al.* 2017; Shikanai & Yamamoto 2017). Recent studies have indicated that the  
375 water-water cycle can rapidly consume the excess reducing power in PSI and thus prevents a  
376 transient PSI over-reduction under FL (Huang *et al.* 2019b; Sun *et al.* 2020a). However, a  
377 transient PSI over-reduction under FL was clearly observed (Fig. 4C), indicating that the  
378 water-water cycle is negligible in tomato leaves. Therefore, the transient PSI over-reduction  
379 under FL is attributed to the limitation of LEF. Under drought stress, the restriction of CO<sub>2</sub>  
380 fixation caused LEF to be further restricted by the lack of NADP<sup>+</sup> and thus increased PSI  
381 over-reduction upon the transition from low to high light.

382       Once PSI is over-reduced under high light, the donation of electrons from PSI electron  
383 carriers to O<sub>2</sub> accelerates, aggravating the production of ROS within PSI (Takagi *et al.* 2016).  
384 Moreover, ROS produced within thylakoid membranes cannot be immediately scavenged by  
385 antioxidant systems (Takagi *et al.* 2016). Therefore, PSI over-reduction under high light easily  
386 causes PSI photoinhibition (Yamamoto & Shikanai 2019; Tan *et al.* 2021). Consistently, the  
387 stronger PSI over-reduction in FL accelerated PSI photoinhibition under drought stress (Fig.  
388 7). Furthermore, the stronger PSI photoinhibition under drought stress led to decreased  
389 rETRII and Y(ND) and increased Y(NA), suggesting that light use efficiency and  
390 photoprotection were significantly affected by the PSI photoinhibition (Fig. 8). After  
391 photodamage, the recovery of PSI activity is a slow process that requires several days (Zhang  
392 & Scheller 2004; Zivcak *et al.* 2015). During the recovery period, the lower CO<sub>2</sub> assimilation  
393 rate impairs starch accumulation and plant growth (Lima-Melo, Gollan, Tikkanen, Silveira &  
394 Aro 2019). Therefore, when grown under FL, drought stress would decrease plant biomass  
395 partially owing to stronger PSI photoinhibition. In contrast to PSI, the PSII excitation pressure

396 under FL was slightly affected by drought stress (Fig. 5), which was consistent with previous  
397 studies reporting that PSII is tolerant to FL (Yamamoto & Shikanai 2019).

398 To protect PSI against photoinhibition under FL, angiosperms mainly use CEF to  
399 fine-tune the PSI redox state through regulation of  $\Delta pH$  (Armbruster *et al.* 2017). Under low  
400 light, upon a low CEF activation, a relatively low  $\Delta pH$  is formed to facilitate electron flow  
401 through Cyt b6/f and thus to maximize light use efficiency (Tikkanen & Aro 2014). Under  
402 high light, CEF is highly activated to generate a high  $\Delta pH$ , which slows down the oxidation of  
403 plastoquinone and thus down-regulates the rate of electron transport toward PSI (Shikanai &  
404 Yamamoto 2017). When transitioning from low to high light, the full acidification of the  
405 thylakoid lumen requires dozens of seconds (Huang *et al.* 2019b; Yang, Zhang & Huang  
406 2019b). Therefore, plants cannot generate sufficient  $\Delta pH$  within the first seconds after an  
407 abrupt increase in irradiance. To avoid uncontrolled PSI over-reduction under FL, CEF  
408 rapidly activates to aid the formation of  $\Delta pH$  (Kono *et al.* 2014; Yang *et al.* 2019a). In the  
409 present study, we found relative CEF activity in high-light phases of FL increased under  
410 drought stress (Fig. 6), suggesting that the relative contribution of CEF to  $\Delta pH$  formation was  
411 enhanced in drought-stressed plants. Such up-regulation of CEF activity partially  
412 compensated for the restriction of CO<sub>2</sub> fixation and thus favored PSI photoprotection under  
413 FL.

414

## 415 **Conclusions**

416 We established that drought stress largely affects  $g_s$  and  $g_m$  after the transition from low  
417 to high light and thus delays photosynthetic induction under FL. Furthermore, restriction of  
418 CO<sub>2</sub> assimilation under drought stress accelerates PSI over-reduction under FL, which  
419 increases the susceptibility of PSI to photoinhibition. Therefore, drought stress strongly  
420 affects the photosynthetic dark and light reactions under FL. These findings provide insight  
421 into photosynthetic physiology under drought and FL.

422

## 423 **References**

424 Acevedo-Siaca L.G., Coe R., Wang Y., Kromdijk J., Quick W.P. & Long S.P. (2020)

425 Variation in photosynthetic induction between rice accessions and its potential for

- 426 improving productivity. *New Phytologist* **227**, 1097–1108.
- 427 Adachi S., Tanaka Y., Miyagi A., Kashima M., Tezuka A., Toya Y., ... Yamori W. (2019)
- 428 High-yielding rice Takanari has superior photosynthetic response to a commercial rice
- 429 Koshihikari under fluctuating light. *Journal of Experimental Botany* **70**, 5287–5297.
- 430 Alboresi A., Storti M. & Morosinotto T. (2019) Balancing protection and efficiency in the
- 431 regulation of photosynthetic electron transport across plant evolution. *New Phytologist*
- 432 **221**, 105–109.
- 433 Allahverdiyeva Y., Suorsa M., Tikkanen M. & Aro E.M. (2015) Photoprotection of
- 434 photosystems in fluctuating light intensities. *Journal of Experimental Botany* **66**,
- 435 2427–2436.
- 436 Armbruster U., Correa Galvis V., Kunz H.H. & Strand D.D. (2017) The regulation of the
- 437 chloroplast proton motive force plays a key role for photosynthesis in fluctuating light.
- 438 *Current Opinion in Plant Biology* **37**, 56–62.
- 439 Baker N.R. (2004) Applications of chlorophyll fluorescence can improve crop production
- 440 strategies: an examination of future possibilities. *Journal of Experimental Botany* **55**,
- 441 1607–1621.
- 442 von Caemmerer S. & Evans J.R. (2015) Temperature responses of mesophyll conductance
- 443 differ greatly between species. *Plant, Cell and Environment* **38**, 629–637.
- 444 Carriquí M., Cabrera H.M., Conesa M., Coopman R.E., Douthe C., Gago J., ... Flexas J.
- 445 (2015) Diffusional limitations explain the lower photosynthetic capacity of ferns as
- 446 compared with angiosperms in a common garden study. *Plant, Cell and Environment* **38**,
- 447 448–460.
- 448 Flexas J., Diaz-Espejo A., Gago J., Gallé A., Galmés J., Gulías J. & Medrano H. (2014)
- 449 Photosynthetic limitations in Mediterranean plants: A review. *Environmental and*
- 450 *Experimental Botany* **103**, 12–23.
- 451 Galmés J., Ochogavía J.M., Gago J., Roldán E.J., Cifre J. & Conesa M.À. (2013) Leaf
- 452 responses to drought stress in Mediterranean accessions of *Solanum lycopersicum*:
- 453 Anatomical adaptations in relation to gas exchange parameters. *Plant, Cell and*
- 454 *Environment* **36**, 920–935.
- 455 Genty B., Briantais J.-M. & Baker N.R. (1989) The relationship between the quantum yield of



- 456 photosynthetic electron transport and quenching of chlorophyll fluorescence. *Biochimica*  
457 *et Biophysica Acta (BBA) - General Subjects* **990**, 87–92.
- 458 Gerotto C., Alboresi A., Meneghesso A., Jokel M., Suorsa M., Aro E.-M. & Morosinotto T.  
459 (2016) Flavodiiron proteins act as safety valve for electrons in *Physcomitrella patens*.  
460 *Proceedings of the National Academy of Sciences* **113**, 12322–12327.
- 461 Grassi G. & Magnani F. (2005) Stomatal, mesophyll conductance and biochemical limitations  
462 to photosynthesis as affected by drought and leaf ontogeny in ash and oak trees. *Plant,*  
463 *Cell and Environment* **28**, 834–849.
- 464 Grieco M., Roustan V., Dermendjiev G., Rantala S., Jain A., Leonardelli M., ... Teige M.  
465 (2020) Adjustment of photosynthetic activity to drought and fluctuating light in wheat.  
466 *Plant, Cell & Environment* **43**, 1484–1500.
- 467 Harb A., Krishnan A., Ambavaram M.M.R. & Pereira A. (2010) Molecular and Physiological  
468 Analysis of Drought Stress in Arabidopsis Reveals Early Responses Leading to  
469 Acclimation in Plant Growth. *Plant Physiology* **154**, 1254–1271.
- 470 Harley P.C., Loreto F., Di Marco G. & Sharkey T.D. (1992) Theoretical considerations when  
471 estimating the mesophyll conductance to CO<sub>2</sub> flux by analysis of the response of  
472 photosynthesis to CO<sub>2</sub>. *Plant Physiology* **98**, 1429–1436.
- 473 Huang W., Fu P.L., Jiang Y.J., Zhang J.L., Zhang S.B., Hu H. & Cao K.F. (2013) Differences  
474 in the responses of photosystem I and photosystem II of three tree species *Cleistanthus*  
475 *sumatranus*, *Celtis philippensis* and *Pistacia weinmannifolia* exposed to a prolonged  
476 drought in a tropical limestone forest. *Tree Physiology*.
- 477 Huang W., Yang Y.-J. & Zhang S.-B. (2019a) Photoinhibition of photosystem I under  
478 fluctuating light is linked to the insufficient  $\Delta pH$  upon a sudden transition from low to  
479 high light. *Environmental and Experimental Botany* **160**, 112–119.
- 480 Huang W., Yang Y.-J. & Zhang S.-B. (2019b) The role of water-water cycle in regulating the  
481 redox state of photosystem I under fluctuating light. *Biochimica et Biophysica Acta*  
482 *(BBA) - Bioenergetics* **1860**, 383–390.
- 483 Ilík P., Pavlovič A., Kouřil R., Alboresi A., Morosinotto T., Allahverdiyeva Y., ... Shikanai T.  
484 (2017) Alternative electron transport mediated by flavodiiron proteins is operational in  
485 organisms from cyanobacteria up to gymnosperms. *New Phytologist* **214**, 967–972.

- 486 Kaiser E., Morales A., Harbinson J., Heuvelink E. & Marcelis L.F.M. (2020) High Stomatal  
487 Conductance in the Tomato Flacca Mutant Allows for Faster Photosynthetic Induction.  
488 *Frontiers in Plant Science* **11**, 1–12.
- 489 Kimura H., Hashimoto-Sugimoto M., Iba K., Terashima I. & Yamori W. (2020) Improved  
490 stomatal opening enhances photosynthetic rate and biomass production in fluctuating  
491 light. *Journal of Experimental Botany* **71**, 2339–2350.
- 492 Kono M., Noguchi K. & Terashima I. (2014) Roles of the cyclic electron flow around PSI  
493 (CEF-PSI) and O<sub>2</sub>-dependent alternative pathways in regulation of the photosynthetic  
494 electron flow in short-term fluctuating light in *Arabidopsis thaliana*. *Plant and Cell  
495 Physiology* **55**, 990–1004.
- 496 Krall J.P. & Edwards G.E. (1992) Relationship between photosystem II activity and CO<sub>2</sub>  
497 fixation in leaves. *Physiologia Plantarum* **86**, 180–187.
- 498 Lawson T. & Blatt M.R. (2014) Stomatal Size, Speed, and Responsiveness Impact on  
499 Photosynthesis and Water Use Efficiency. *Plant Physiology* **164**, 1556–1570.
- 500 Lima-Melo Y., Gollan P.J., Tikkanen M., Silveira J.A.G. & Aro E.M. (2019) Consequences  
501 of photosystem-I damage and repair on photosynthesis and carbon use in *Arabidopsis  
502 thaliana*. *Plant Journal* **97**, 1061–1072.
- 503 Long S.P. & Bernacchi C.J. (2003) Gas exchange measurements, what can they tell us about  
504 the underlying limitations to photosynthesis? Procedures and sources of error. *Journal of  
505 Experimental Botany* **54**, 2393–2401.
- 506 Oukarroum A., Schansker G. & Strasser R.J. (2009) Drought stress effects on photosystem I  
507 content and photosystem II thermotolerance analyzed using Chl a fluorescence kinetics  
508 in barley varieties differing in their drought tolerance. *Physiologia Plantarum* **137**,  
509 188–189.
- 510 Pearcy R.W. (1990) Sunflecks and photosynthesis in plant canopies. *Annual Review of Plant  
511 Physiology and Plant Molecular Biology* **41**, 421–453.
- 512 Qu M., Essemine J., Xu J., Ablat G., Perveen S., Wang H., ... Zhu X. (2020) Alterations in  
513 stomatal response to fluctuating light increase biomass and yield of rice under drought  
514 conditions. *The Plant Journal* **104**, 1334–1347.
- 515 Ramachandra A. & Viswanatha K. (2004) Drought-induced responses of photosynthesis and

- 516 antioxidant metabolism in higher plants. **161**, 1189–1202.
- 517 Sakoda K., Yamori W., Groszmann M. & Evans J.R. (2021) Stomatal , mesophyll  
518 conductance , and biochemical limitations to photosynthesis during induction Research  
519 Article. 146–160.
- 520 Sakoda K., Yamori W., Shimada T., Sugano S.S., Hara-Nishimura I. & Tanaka Y. (2020)  
521 Higher stomatal density improves photosynthetic induction and biomass production in  
522 Arabidopsis under fluctuating light. *Frontiers in Plant Science* **11**, 1308.
- 523 Sejima T., Takagi D., Fukayama H., Makino A. & Miyake C. (2014) Repetitive short-pulse  
524 light mainly inactivates photosystem i in sunflower leaves. *Plant and Cell Physiology* **55**,  
525 1184–1193.
- 526 Shikanai T. & Yamamoto H. (2017) Contribution of cyclic and pseudo-cyclic electron  
527 transport to the formation of proton motive force in chloroplasts. *Molecular Plant* **10**,  
528 20–29.
- 529 Shimakawa G. & Miyake C. (2019) What quantity of photosystem I is optimum for safe  
530 photosynthesis? *Plant Physiology* **179**, 1479–1485.
- 531 Slattery R.A., Walker B.J., Weber A.P.M. & Ort D.R. (2018) The impacts of fluctuating light  
532 on crop performance. *Plant Physiology* **176**, 990–1003.
- 533 De Souza A.P., Wang Y., Orr D.J., Carmo□Silva E. & Long S.P. (2020) Photosynthesis  
534 across African cassava germplasm is limited by Rubisco and mesophyll conductance at  
535 steady state, but by stomatal conductance in fluctuating light. *New Phytologist* **225**,  
536 2498–2512.
- 537 Sun H., Yang Y.-J. & Huang W. (2020a) The water-water cycle is more effective in  
538 regulating redox state of photosystem I under fluctuating light than cyclic electron  
539 transport. *Biochimica et Biophysica Acta (BBA) - Bioenergetics* **1861**, 148235.
- 540 Sun H., Zhang S.-B., Liu T. & Huang W. (2020b) Decreased photosystem II activity  
541 facilitates acclimation to fluctuating light in the understory plant Paris polyphylla.  
542 *Biochimica et Biophysica Acta (BBA) - Bioenergetics* **1861**, 148135.
- 543 Suorsa M., Jarvi S., Grieco M., Nurmi M., Pietrzykowska M., Rantala M., ... Aro E.-M.  
544 (2012) PROTON GRADIENT REGULATION5 is essential for proper acclimation of  
545 Arabidopsis photosystem I to naturally and artificially fluctuating light conditions. *The*

- 546 *Plant Cell* **24**, 2934–2948.
- 547 Takagi D., Takumi S., Hashiguchi M., Sejima T. & Miyake C. (2016) Superoxide and singlet  
548 oxygen produced within the thylakoid membranes both cause photosystem I  
549 photoinhibition. *Plant Physiology* **171**, 1626–1634.
- 550 Tan S.-L., Huang J.-L., Zhang F.-P., Zhang S.-B. & Huang W. (2021) Photosystem I  
551 photoinhibition induced by fluctuating light depends on background low light irradiance.  
552 *Environmental and Experimental Botany* **181**, 104298.
- 553 Tanaka Y., Adachi S. & Yamori W. (2019) Natural genetic variation of the photosynthetic  
554 induction response to fluctuating light environment. *Current Opinion in Plant Biology*  
555 **49**, 52–59.
- 556 Tazoe Y., Ishikawa N., Shikanai T., Ishiyama K., Takagi D., Makino A., ... Endo T. (2020)  
557 Overproduction of PGR5 enhances the electron sink downstream of photosystem I in a  
558 C 4 plant, *Flaveria bidentis*. *The Plant Journal* **103**, 814–823.
- 559 Tikkanen M. & Aro E.M. (2014) Integrative regulatory network of plant thylakoid energy  
560 transduction. *Trends in Plant Science* **19**, 10–17.
- 561 Vialet-Chabrand S., Matthews J.S.A., Simkin A.J., Raines C.A. & Lawson T. (2017)  
562 Importance of Fluctuations in Light on Plant Photosynthetic Acclimation. *Plant*  
563 *Physiology* **173**, 2163–2179.
- 564 Wada S., Yamamoto H., Suzuki Y., Yamori W., Shikanai T. & Makino A. (2018) Flavodiiron  
565 protein substitutes for cyclic electron flow without competing CO<sub>2</sub> assimilation in rice.  
566 *Plant Physiology* **176**, 1509–1518.
- 567 Warren C., Livingston N.J. & Turpin D.H. (2004) Water stress decreases the transfer  
568 conductance of Douglas-fir (*Pseudotsuga menziesii*) seedlings. *Tree physiology* **24**,  
569 971–979.
- 570 Warren C.R. & Dreyer E. (2006) Temperature response of photosynthesis and internal  
571 conductance to CO<sub>2</sub>: Results from two independent approaches. *Journal of*  
572 *Experimental Botany* **57**, 3057–3067.
- 573 Xiong D., Douthe C. & Flexas J. (2018) Differential coordination of stomatal conductance,  
574 mesophyll conductance, and leaf hydraulic conductance in response to changing light  
575 across species. *Plant, Cell & Environment* **41**, 436–450.

- 576 Yamamoto H. & Shikanai T. (2019) PGR5-dependent cyclic electron flow protects  
577 photosystem I under fluctuating light at donor and acceptor sides. *Plant Physiology* **179**,  
578 588–600.
- 579 Yamori W., Evans J.R. & Von Caemmerer S. (2010a) Effects of growth and measurement  
580 light intensities on temperature dependence of CO<sub>2</sub> assimilation rate in tobacco leaves.  
581 *Plant, Cell and Environment* **33**, 332–343.
- 582 Yamori W., Kusumi K., Iba K. & Terashima I. (2020) Increased stomatal conductance  
583 induces rapid changes to photosynthetic rate in response to naturally fluctuating light  
584 conditions in rice. *Plant, Cell & Environment* **43**, 1230–1240.
- 585 Yamori W., Makino A. & Shikanai T. (2016) A physiological role of cyclic electron transport  
586 around photosystem I in sustaining photosynthesis under fluctuating light in rice.  
587 *Scientific reports* **6**, 20147.
- 588 Yamori W., Nagai T. & Makino A. (2011) The rate-limiting step for CO<sub>2</sub> assimilation at  
589 different temperatures is influenced by the leaf nitrogen content in several C<sub>3</sub> crop  
590 species. *Plant, Cell and Environment* **34**, 764–777.
- 591 Yamori W., Noguchi K., Hikosaka K. & Terashima I. (2010b) Phenotypic plasticity in  
592 photosynthetic temperature acclimation among crop species with different cold  
593 tolerances. *Plant Physiology* **152**, 388–399.
- 594 Yang Y.-J., Ding X.-X. & Huang W. (2019a) Stimulation of cyclic electron flow around  
595 photosystem I upon a sudden transition from low to high light in two angiosperms  
596 *Arabidopsis thaliana* and *Bletilla striata*. *Plant Science* **287**, 110166.
- 597 Yang Y.-J., Zhang S.-B. & Huang W. (2019b) Photosynthetic regulation under fluctuating  
598 light in young and mature leaves of the CAM plant *Bryophyllum pinnatum*. *Biochimica*  
599 *et Biophysica Acta (BBA) - Bioenergetics* **1860**, 469–477.
- 600 Zhang S. & Scheller H.V. (2004) Photoinhibition of photosystem I at chilling temperature and  
601 subsequent recovery in *Arabidopsis thaliana*. *Plant and Cell Physiology* **45**, 1595–1602.
- 602 Zhang Y., Kaiser E., Marcelis L.F.M., Yang Q. & Li T. (2020) Salt stress and fluctuating  
603 light have separate effects on photosynthetic acclimation, but interactively affect  
604 biomass. *Plant, Cell & Environment* **43**, 2192–2206.
- 605 Zivcak M., Brestic M., Balatova Z., Drevenakova P., Olsovska K., Kalaji H.M., ...

606 Allakhverdiev S.I. (2013) Photosynthetic electron transport and specific photoprotective  
607 responses in wheat leaves under drought stress. *Photosynthesis Research* **117**, 529–546.  
608 Zivcak M., Brestic M., Kunderlikova K., Sytar O. & Allakhverdiev S.I. (2015) Repetitive  
609 light pulse-induced photoinhibition of photosystem I severely affects CO<sub>2</sub> assimilation  
610 and photoprotection in wheat leaves. *Photosynthesis Research* **126**, 449–463.  
611  
612

613 **Figure legends**

614 **Figure 1.** The effects of drought stress on photosynthetic induction after transition from low  
615 to high light. Time course of net CO<sub>2</sub> assimilation ( $A_N$ ; A and B), stomatal conductance ( $g_s$ ; C  
616 and D) and mesophyll conductance ( $g_m$ ; E and F) after transition from 100 to 1500  $\mu\text{mol}$   
617 photons  $\text{m}^{-2} \text{s}^{-1}$ . Before this measurement, leaves were adapted to low irradiance (100  $\mu\text{mol}$   
618 photons  $\text{m}^{-2} \text{s}^{-1}$ ) for 5 min.  $A_N$ ,  $g_s$  and  $g_m$  were normalized against the maximum values after  
619 photosynthetic induction for 30 min. Values are means  $\pm$  SE of five independent experiments  
620 (n = 5).

621

622 **Figure 2.** Effects of drought stress on the time course of intercellular CO<sub>2</sub> concentration ( $C_i$ ;  
623 A) and chloroplast CO<sub>2</sub> concentration ( $C_c$ ; B), and the relationship between  $C_c$  and  $A_N$  after  
624 transition from low to high light. Red and grey dotted lines represent the values of  $C_{\text{trans}}$  (the  
625 chloroplast CO<sub>2</sub> concentration at which the limitation to  $A_N$  transitioned from RuBP  
626 carboxylation to RuBP regeneration) in CK and drought stressed plants, respectively. The  
627 experimental design was the same as described in Figure 1. Values are means  $\pm$  SE of five  
628 independent experiments (n = 5).

629

630 **Figure 3.** Effects of drought stress on the quantitative analysis of stomatal limitation ( $L_s$ ),  
631 mesophyll conductance limitation ( $L_{\text{mc}}$ ) and biochemical limitation ( $L_b$ ) after transition from  
632 low to high light. The experimental design was the same as described in Figure 1. Values are  
633 means  $\pm$  SE of five independent experiments (n = 5).

634

635 **Figure 4.** Effects of drought stress on photosystem I parameter under fluctuating light  
636 alternating between 59  $\mu\text{mol}$  photons  $\text{m}^{-2} \text{s}^{-1}$  (2 min) and 1455  $\mu\text{mol}$  photons  $\text{m}^{-2} \text{s}^{-1}$  (1 min).  
637 Y(I), the quantum yield of PSI photochemistry; Y(ND), the quantum yield of PSI  
638 non-photochemical energy dissipation due to donor side limitation; Y(NA), the quantum yield  
639 of PSI non-photochemical energy dissipation due to acceptor side limitation. Values are  
640 means  $\pm$  SE of five independent experiments (n = 5).

641

642

643 **Figure 5.** Effects of drought stress on photosystem II parameter under fluctuating light  
644 alternating between 59  $\mu\text{mol photons m}^{-2} \text{s}^{-1}$  (2 min) and 1455  $\mu\text{mol photons m}^{-2} \text{s}^{-1}$  (1 min).  
645 Y(II), the quantum yield of PSII photochemistry; NPQ, non-photochemical quenching in PSII;  
646 Y(NO), the quantum yield of non-regulatory energy dissipation in PSII. Values are means  $\pm$   
647 SE of five independent experiments (n = 5).

648

649 **Figure 6.** Effects of drought stress on photosynthetic electron transport rate under fluctuating  
650 light alternating between 59  $\mu\text{mol photons m}^{-2} \text{s}^{-1}$  (2 min) and 1455  $\mu\text{mol photons m}^{-2} \text{s}^{-1}$  (1  
651 min). rETRI, the relative electron transport rate through PSI; rETRII, the relative electron  
652 transport rate through PSII; Relative CEF/LEF, the relative cyclic and linear electron flow  
653 ratio. Values are means  $\pm$  SE of five independent experiments (n = 5).

654

655 **Figure 7.** Effects of drought stress on PSI photoinhibition after fluctuating light treatment. (A)  
656 The extent of PSI photoinhibition was measured by the decrease in Pm; (B) The relationship  
657 between PSI over-reduction within the first 30 s after transition from low to high light  
658 [average Y(NA)<sub>30s</sub>] and PSI photoinhibition; (C) The relationship between the maximum CO<sub>2</sub>  
659 assimilation rate during photosynthetic induction ( $A_{\text{max}}$ ) and PSI photoinhibition. Values are  
660 means  $\pm$  SE of five independent experiments (n = 5). Asterisk indicates a significant different  
661 between the CK-plants and drought-stressed plants.

662

663 **Figure 8.** Effects of drought stress on values of rETR, Y(ND) and Y(NA) 1455  $\mu\text{mol photons}$   
664  $\text{m}^{-2} \text{s}^{-1}$  after fluctuating light treatment. Values are means  $\pm$  SE of five independent  
665 experiments (n = 5). Asterisk indicates a significant different between the CK-plants and  
666 drought-stressed plants.

667



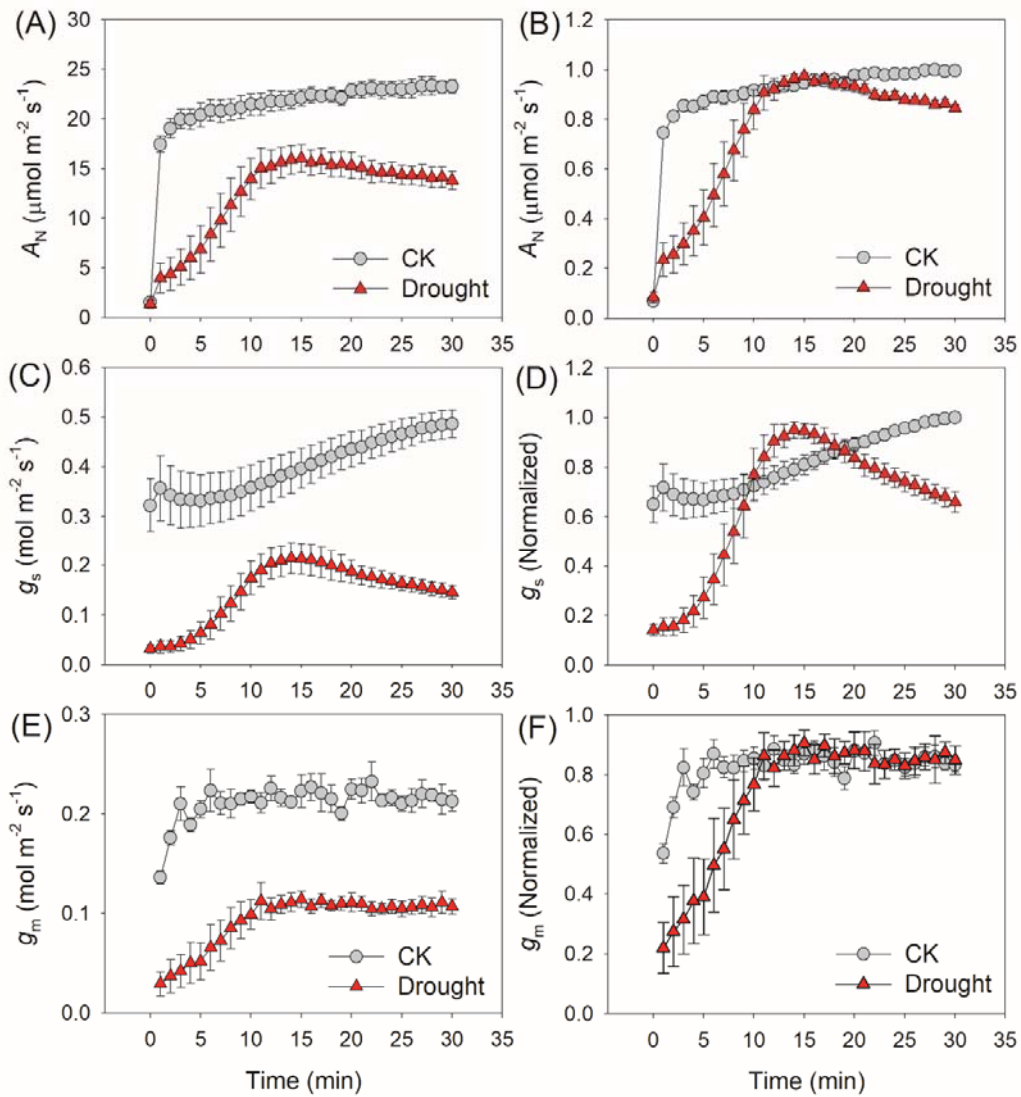

**Figure 1.** The effects of drought stress on photosynthetic induction after transition from low to high light. Time course of net CO<sub>2</sub> assimilation ( $A_N$ ; A and B), stomatal conductance ( $g_s$ ; C and D) and mesophyll conductance ( $g_m$ ; E and F) after transition from 100 to 1500  $\mu\text{mol photons m}^{-2} \text{s}^{-1}$ . Before this measurement, leaves were adapted to low irradiance (100  $\mu\text{mol photons m}^{-2} \text{s}^{-1}$ ) for 5 min.  $A_N$ ,  $g_s$  and  $g_m$  were normalized against the maximum values after photosynthetic induction for 30 min. Values are means  $\pm$  SE of five independent experiments ( $n = 5$ ).

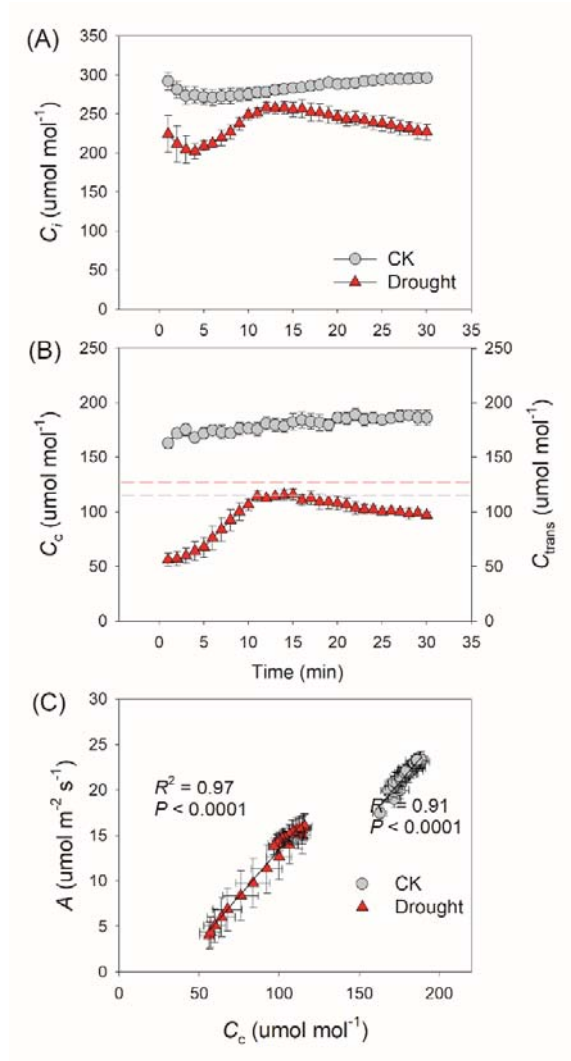

**Figure 2.** Effects of drought stress on the time course of intercellular CO<sub>2</sub> concentration ( $C_i$ ; A) and chloroplast CO<sub>2</sub> concentration ( $C_c$ ; B), and the relationship between  $C_c$  and  $A_N$  after transition from low to high light. Red and grey dotted lines represent the values of  $C_{\text{trans}}$  (the chloroplast CO<sub>2</sub> concentration at which the limitation to  $A_N$  transitioned from RuBP carboxylation to RuBP regeneration) in CK and drought stressed plants, respectively. The experimental design was the same as described in Figure 1. Values are means  $\pm$  SE of five independent experiments ( $n = 5$ ).

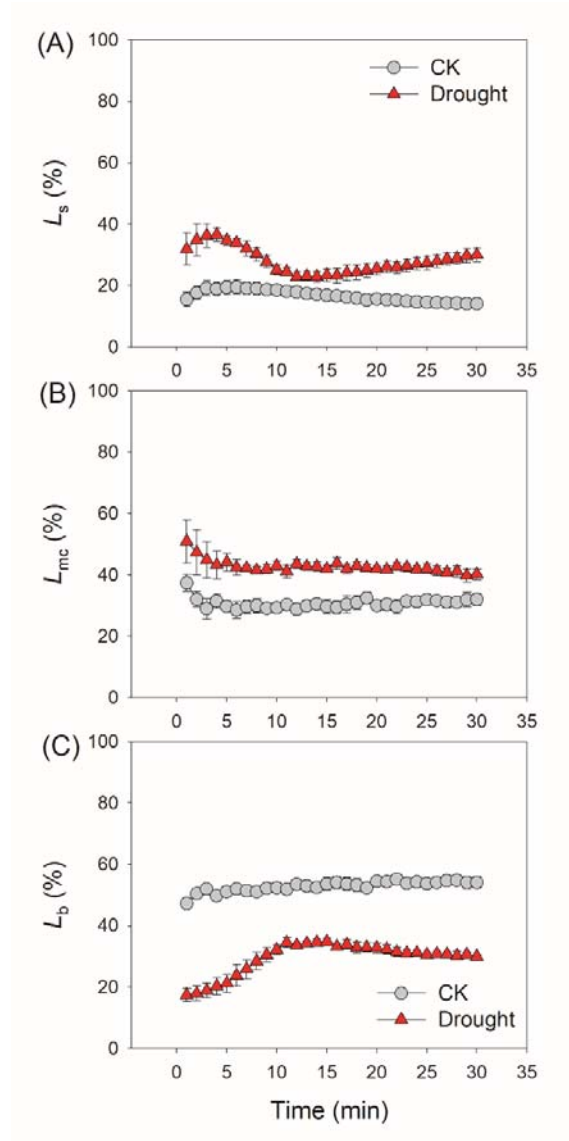

**Figure 3.** Effects of drought stress on the quantitative analysis of stomatal limitation ( $L_s$ ), mesophyll conductance limitation ( $L_{mc}$ ) and biochemical limitation ( $L_b$ ) after transition from low to high light. The experimental design was the same as described in Figure 1. Values are means  $\pm$  SE of five independent experiments ( $n = 5$ ).

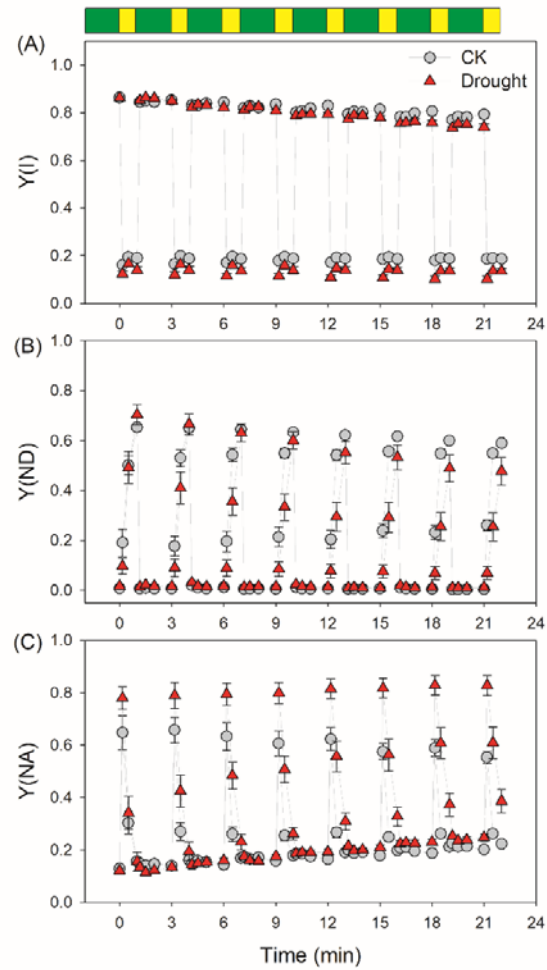

**Figure 4.** Effects of drought stress on photosystem I parameter under fluctuating light alternating between  $59 \mu\text{mol photons m}^{-2} \text{s}^{-1}$  (2 min) and  $1455 \mu\text{mol photons m}^{-2} \text{s}^{-1}$  (1 min). Y(I), the quantum yield of PSI photochemistry; Y(ND), the quantum yield of PSI non-photochemical energy dissipation due to donor side limitation; Y(NA), the quantum yield of PSI non-photochemical energy dissipation due to acceptor side limitation. Values are means  $\pm$  SE of five independent experiments ( $n = 5$ ).

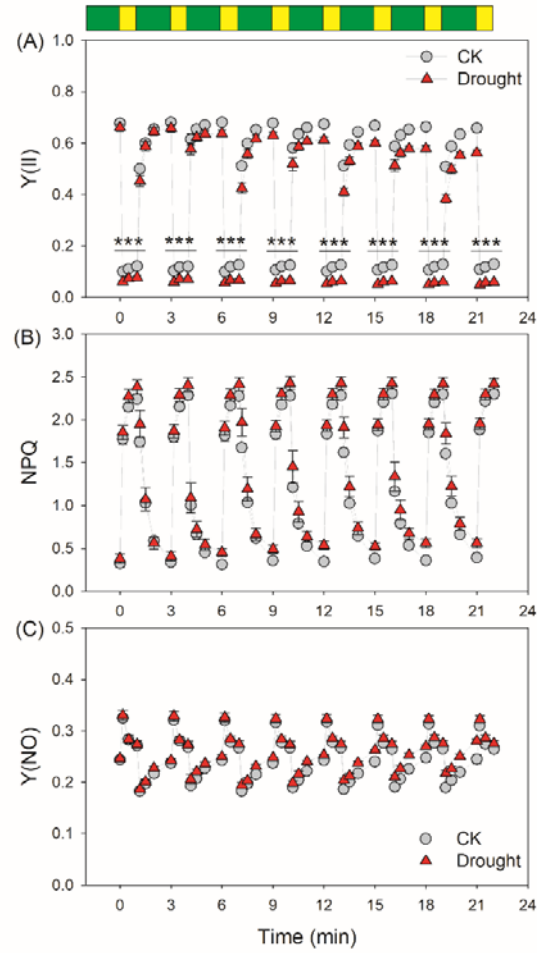

**Figure 5.** Effects of drought stress on photosystem II parameter under fluctuating light alternating between  $59 \mu\text{mol photons m}^{-2} \text{s}^{-1}$  (2 min) and  $1455 \mu\text{mol photons m}^{-2} \text{s}^{-1}$  (1 min). Y(II), the quantum yield of PSII photochemistry; NPQ, non-photochemical quenching in PSII; Y(NO), the quantum yield of non-regulatory energy dissipation in PSII. Values are means  $\pm$  SE of five independent experiments ( $n = 5$ ).

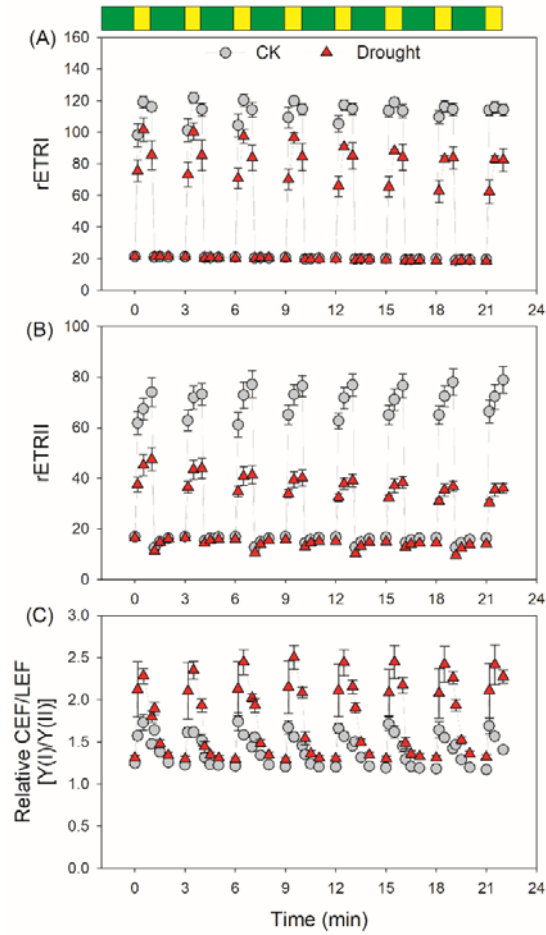

**Figure 6.** Effects of drought stress on photosynthetic electron transport rate under fluctuating light alternating between  $59 \mu\text{mol photons m}^{-2} \text{s}^{-1}$  (2 min) and  $1455 \mu\text{mol photons m}^{-2} \text{s}^{-1}$  (1 min). rETRI, the relative electron transport rate through PSI; rETRII, the relative electron transport rate through PSII; Relative CEF/LEF, the relative cyclic and linear electron flow ratio. Values are means  $\pm$  SE of five independent experiments ( $n = 5$ ).

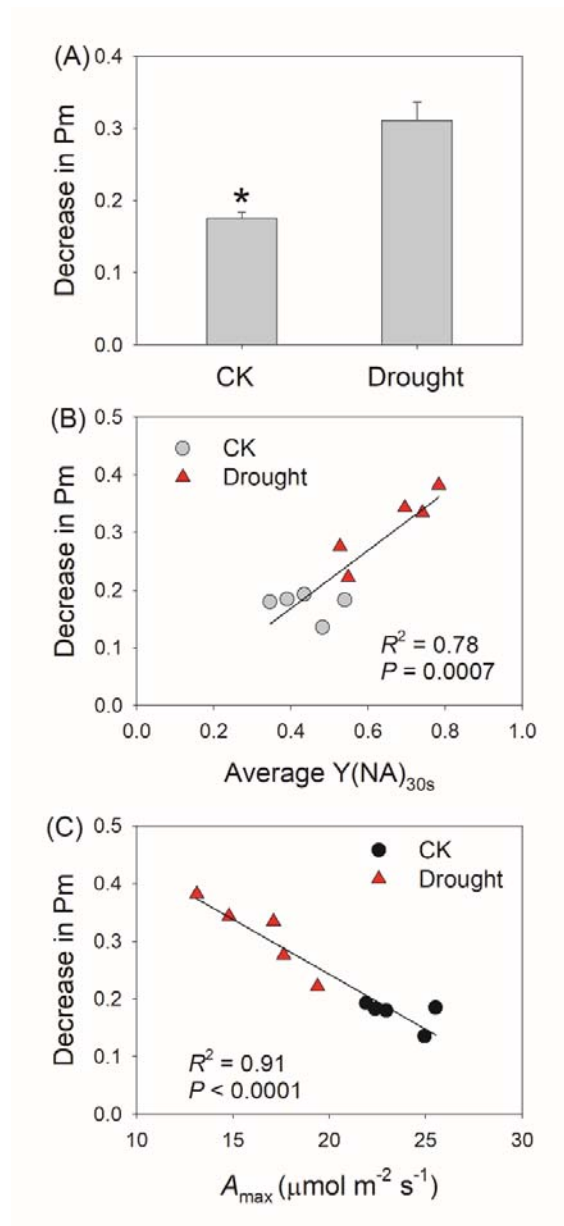

**Figure 7.** Effects of drought stress on PSI photoinhibition after fluctuating light treatment. (A) The extent of PSI photoinhibition was measured by the decrease in Pm; (B) The relationship between PSI over-reduction within the first 30 s after transition from low to high light [average Y(NA)<sub>30s</sub>] and PSI photoinhibition; (C) The relationship between the maximum CO<sub>2</sub> assimilation rate during photosynthetic induction ( $A_{max}$ ) and PSI photoinhibition. Values are means  $\pm$  SE of five independent experiments (n = 5). Asterisk indicates a significant different between the CK-plants and drought-stressed plants.

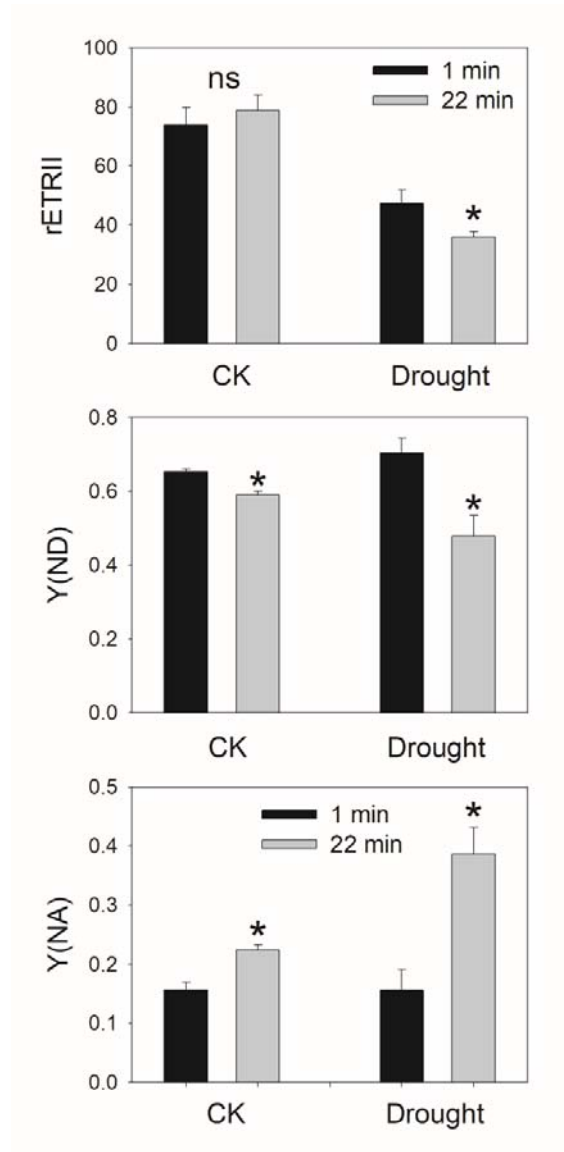

**Figure 8.** Effects of drought stress on values of rETR, Y(ND) and Y(NA) 1455  $\mu\text{mol photons m}^{-2} \text{s}^{-1}$  after fluctuating light treatment. Values are means  $\pm$  SE of five independent experiments ( $n = 5$ ). Asterisk indicates a significant difference between the CK-plants and drought-stressed plants.
